# Supplementary material for: Synthesis and performance study of methylene-bridged bis(nitramino-1,2,4-oxadiazole) and its energetic salts
Source: Royal Society of Chemistry journal article supplement (doi:10.1039/c9nj00421a), 2019-01-01
Supplement: c9nj00421a1.pdf [file c9nj00421a1.pdf]

## Supporting Information

### 1. NMR Spectrum of the prepared compounds

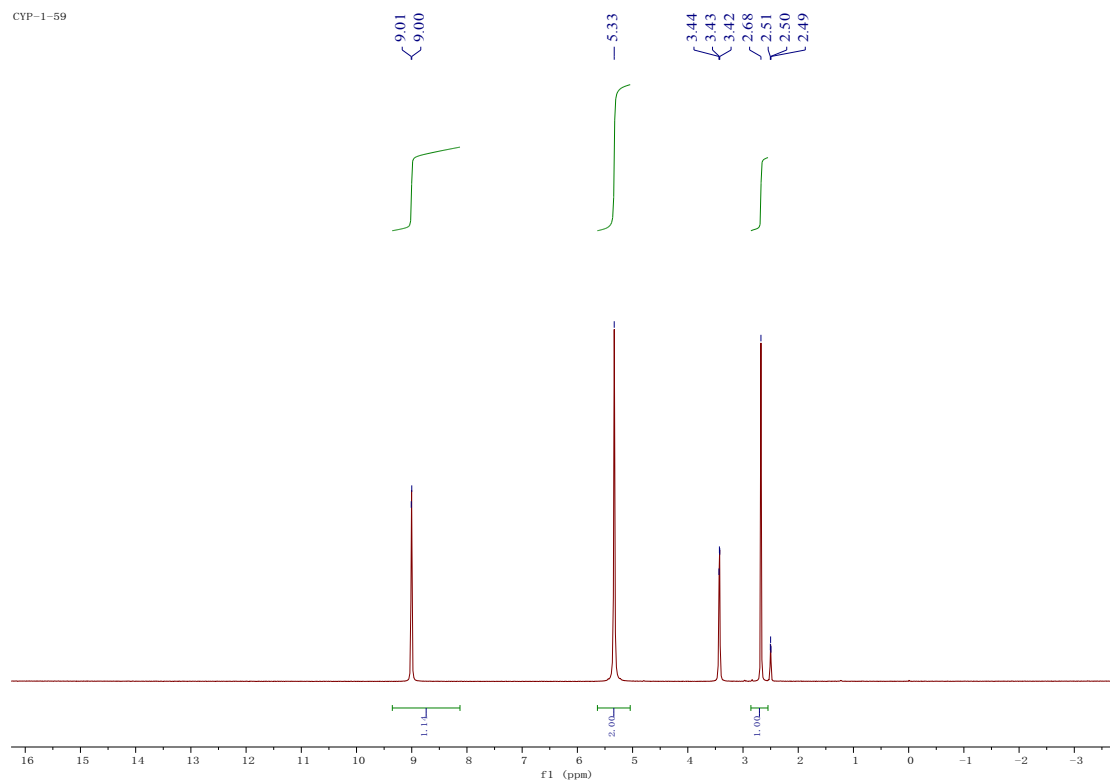

Figure S1  $^1\text{H}$  NMR spectrum of dihydroxyimino-malonic acid diamide.

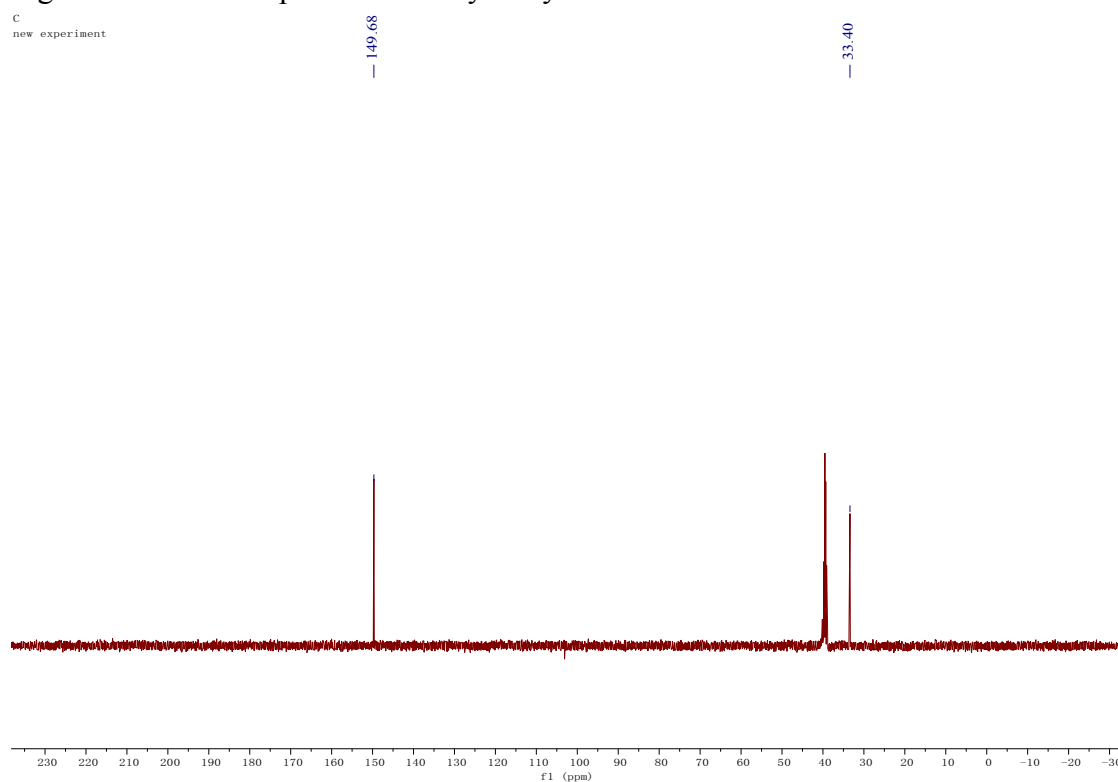

Figure S2  $^{13}\text{C}$  NMR spectrum of dihydroxyimino-malonic acid diamide.

GJ-CYPwhiteH

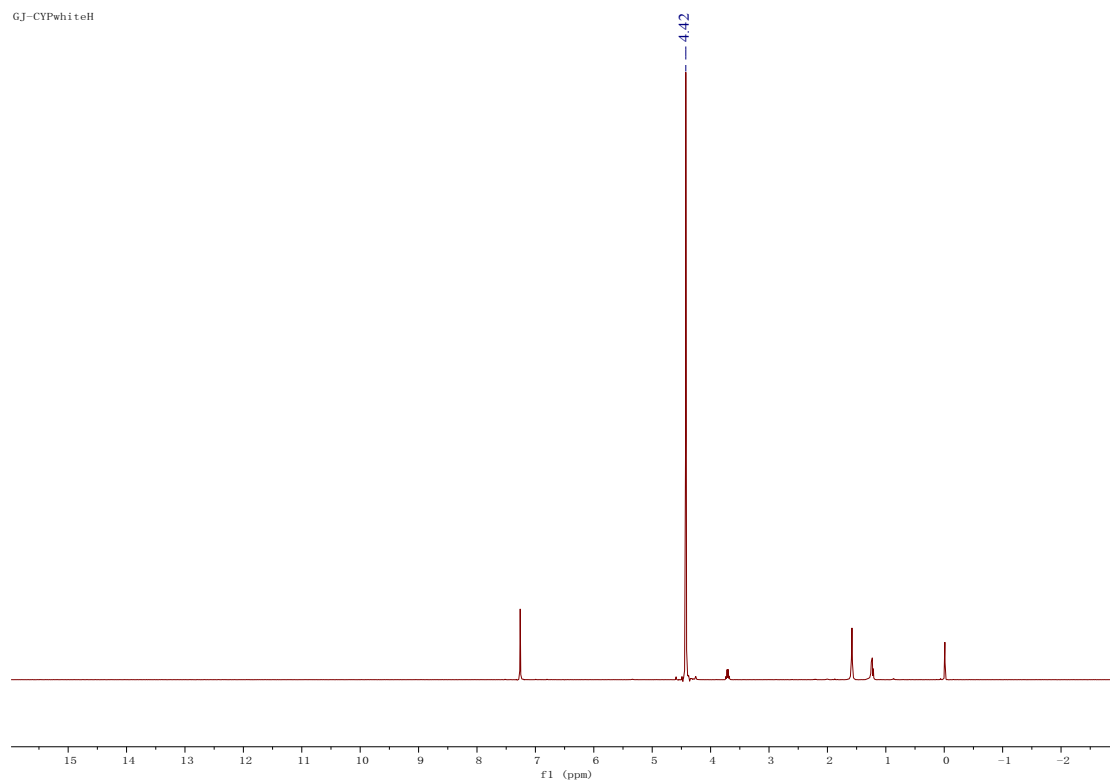

Figure S3 <sup>1</sup>H NMR spectrum of compound 1.

GJ-CYPwhiteC

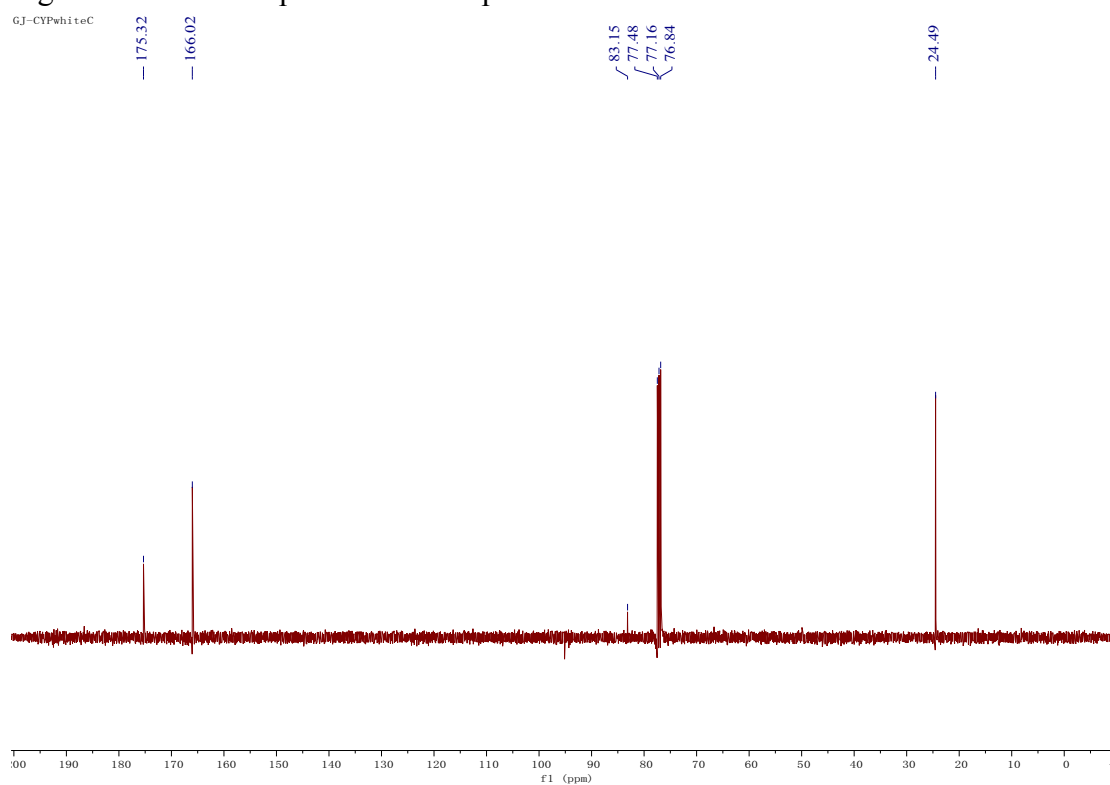

Figure S4 <sup>13</sup>C NMR spectrum of compound 1.

GJ-CYP-yellowH

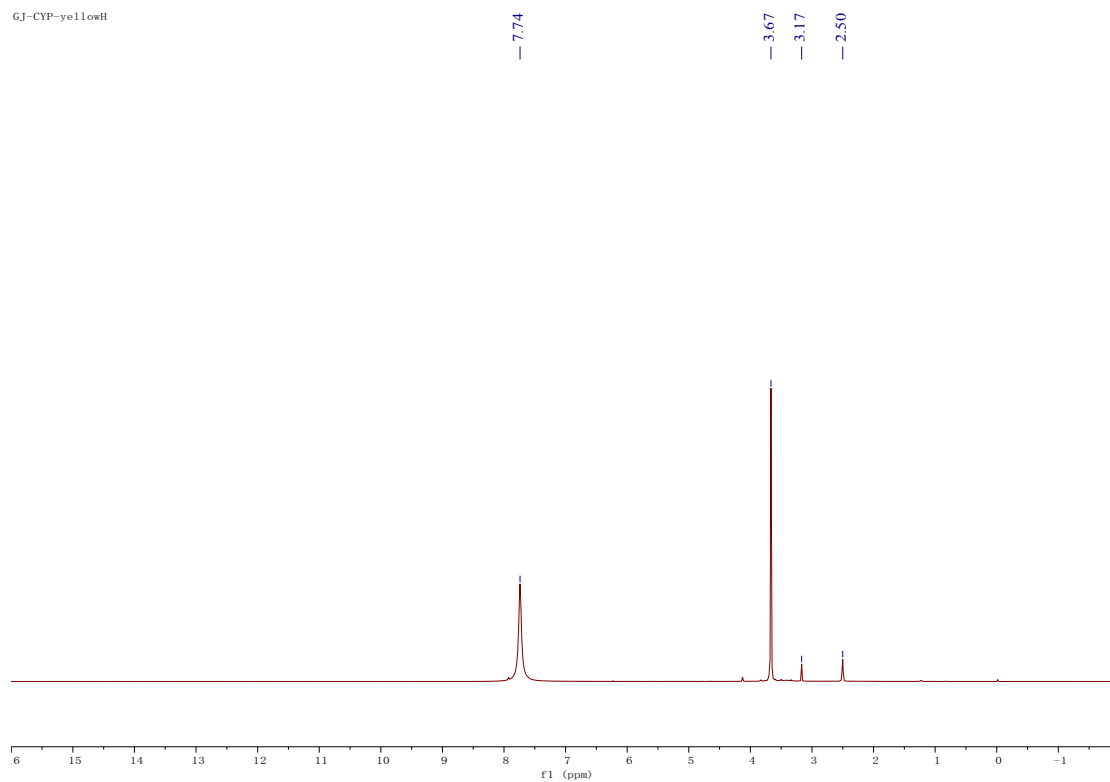

Figure S5 <sup>1</sup>H NMR spectrum of compound 2.

GJ-CYPyellowC

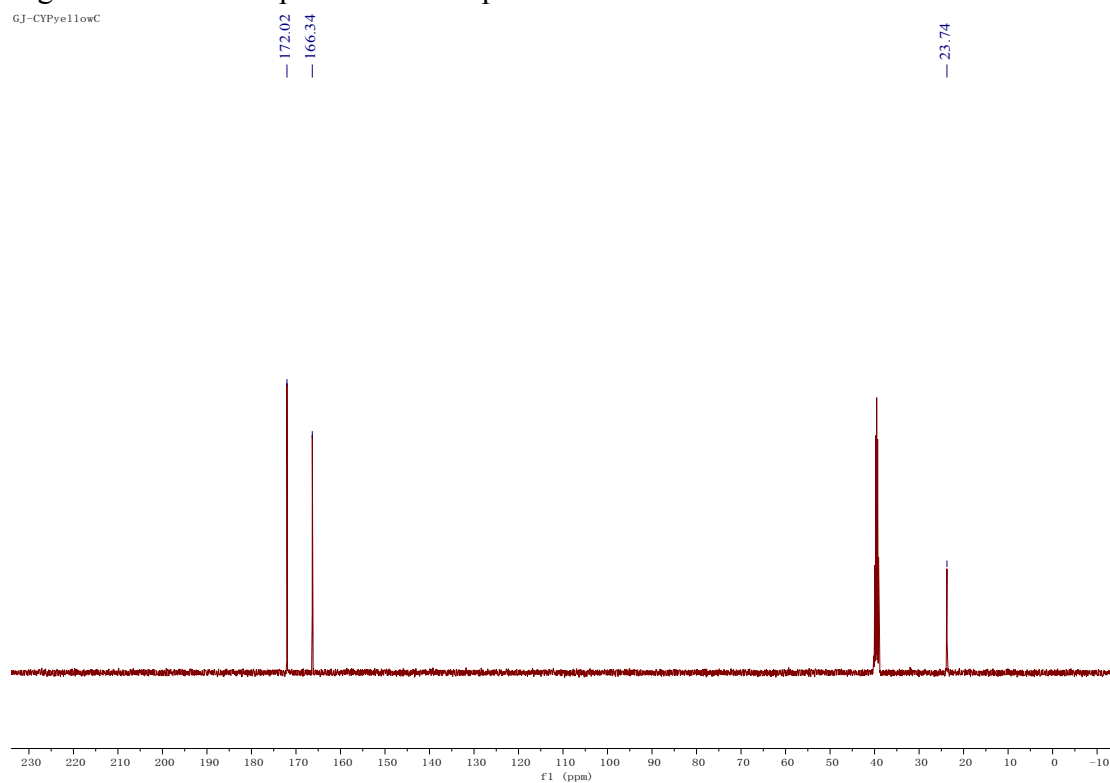

Figure S6 <sup>13</sup>C NMR spectrum of compound 2.

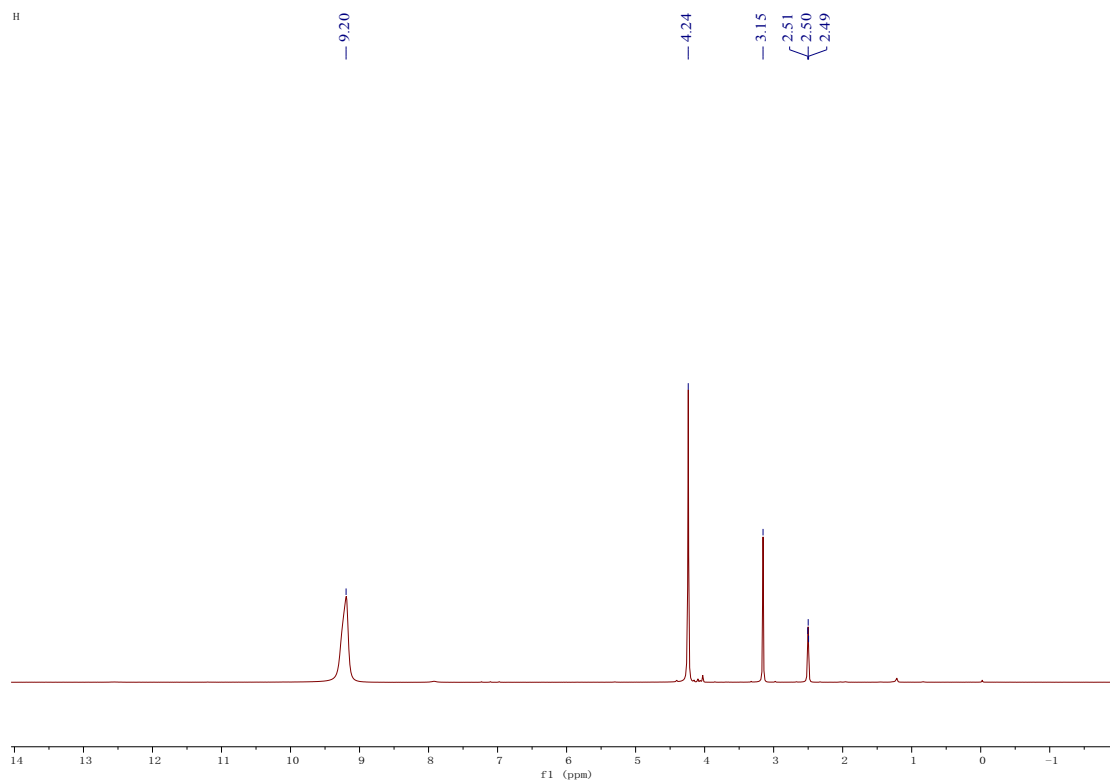

Figure S7  $^1\text{H}$  NMR spectrum of compound **3**.

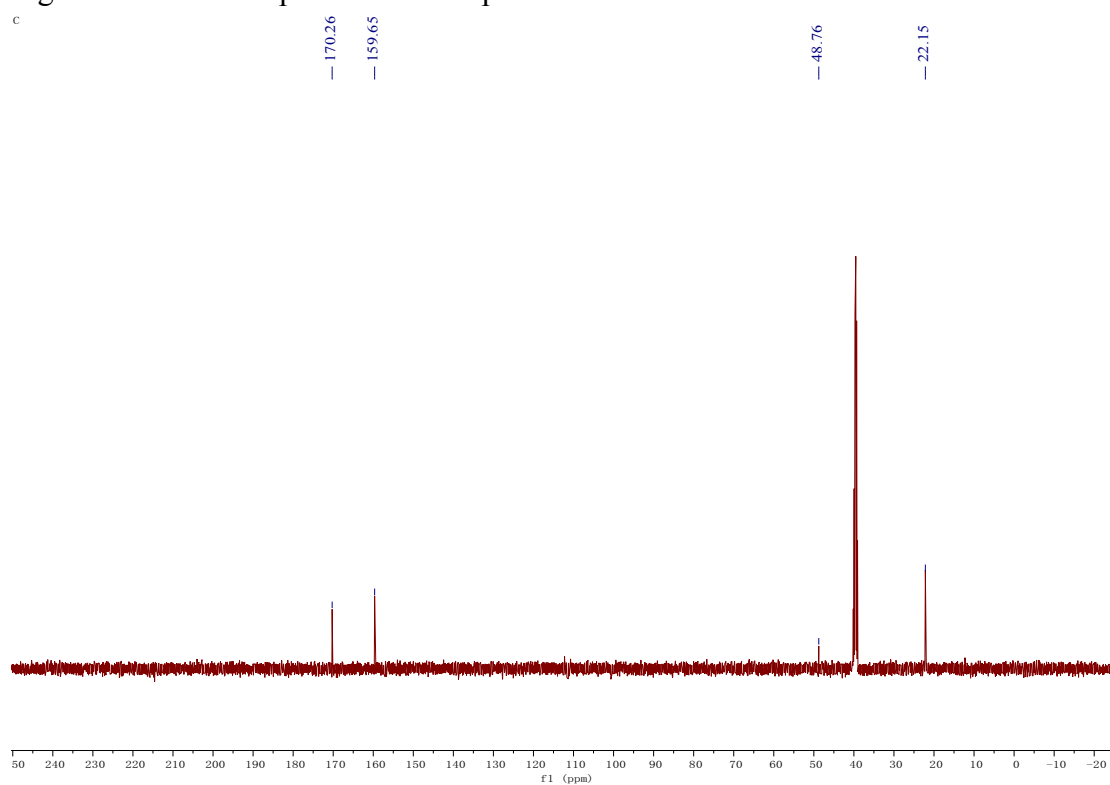

Figure S8  $^{13}\text{C}$  NMR spectrum of compound **3**.

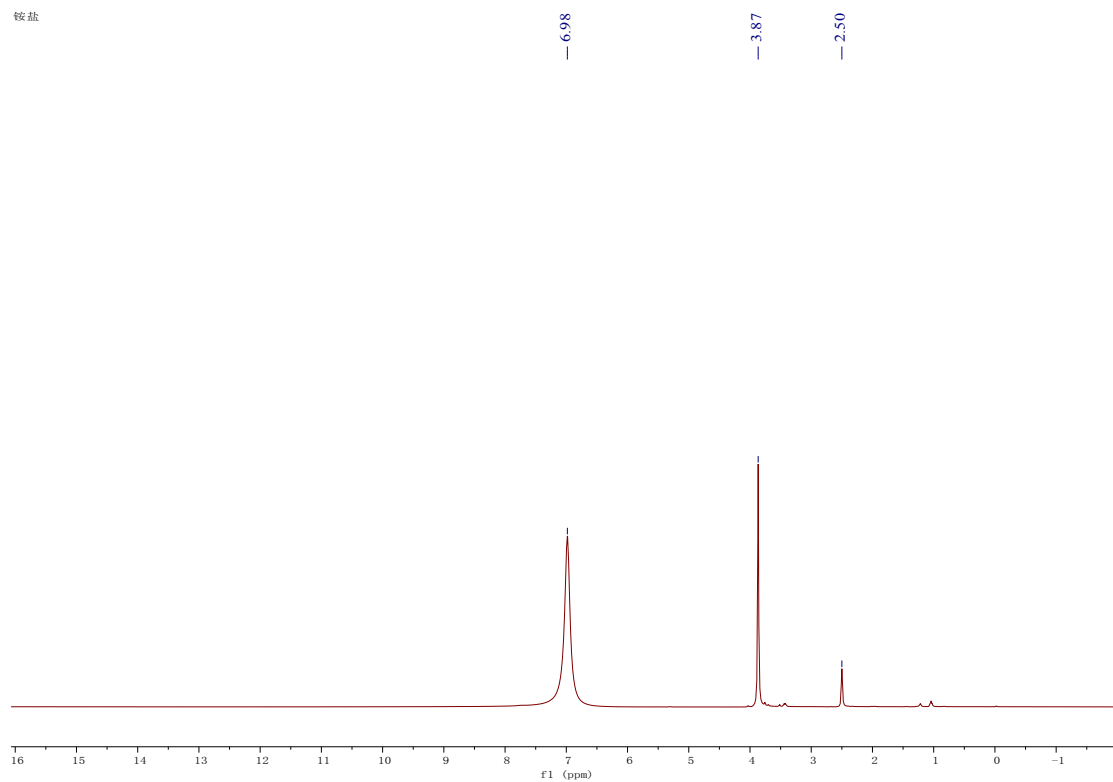

Figure S9  $^1\text{H}$  NMR spectrum of compound 4.

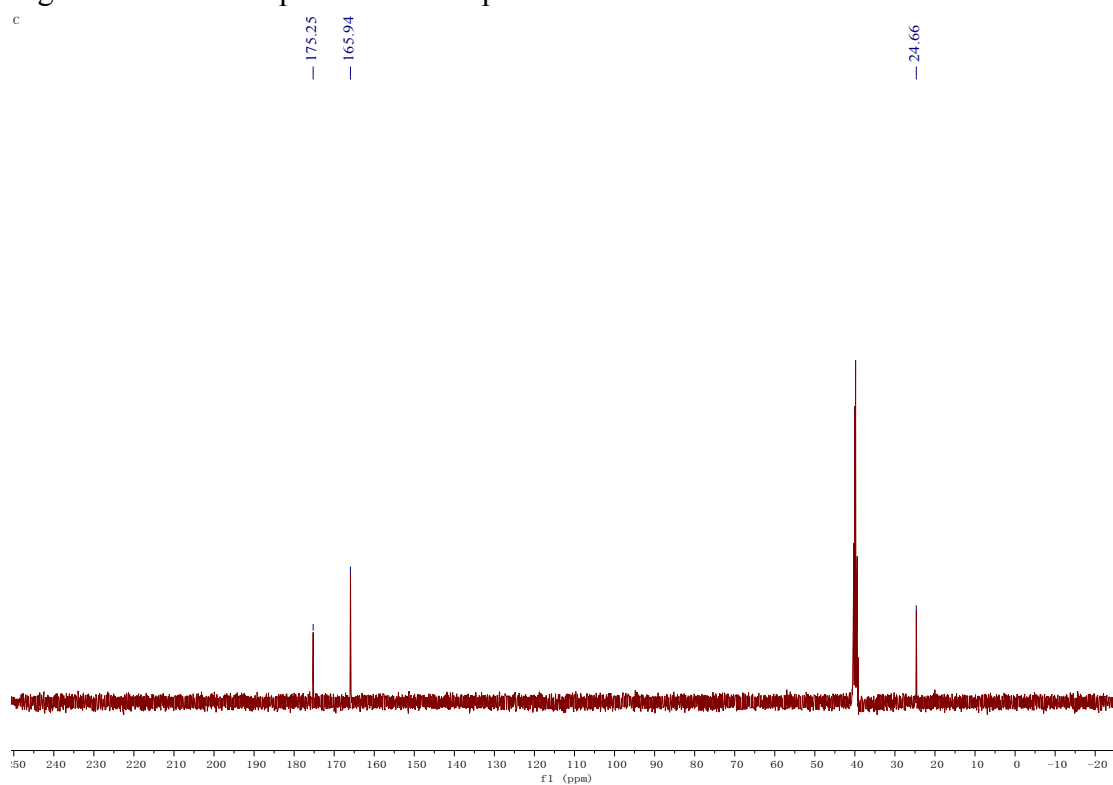

Figure S10  $^{13}\text{C}$  NMR spectrum of compound 4.

胖盐

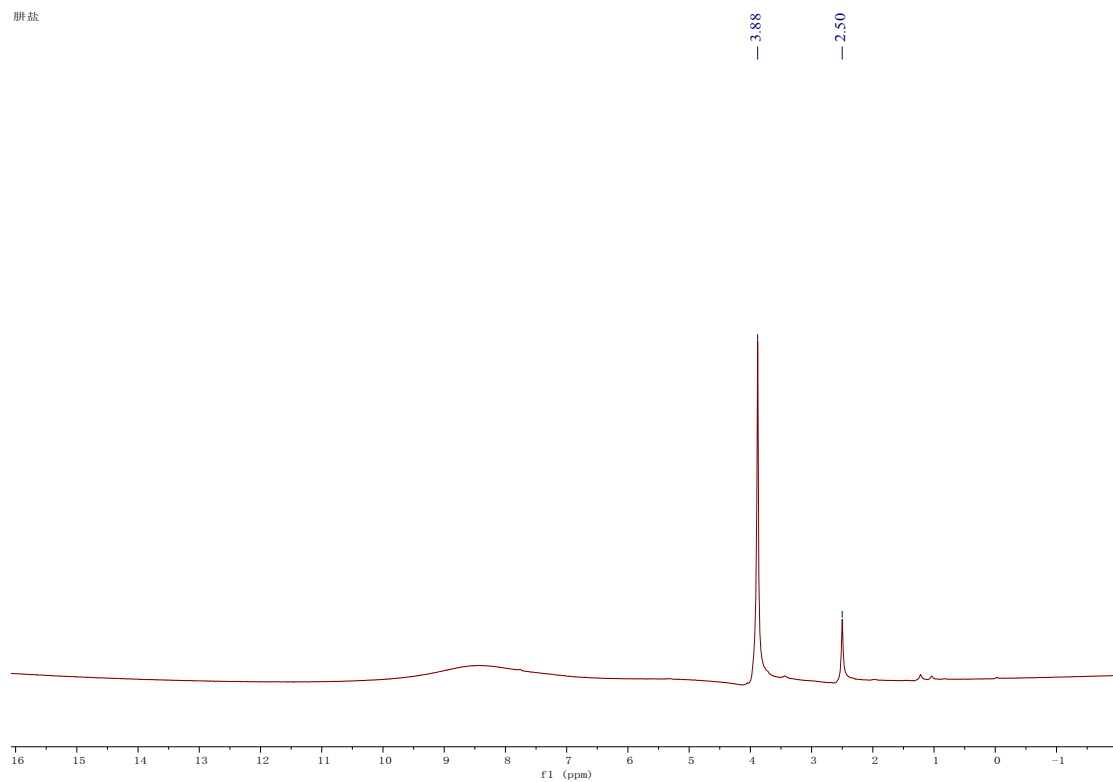

Figure S11 <sup>1</sup>H NMR spectrum of compound **5**.

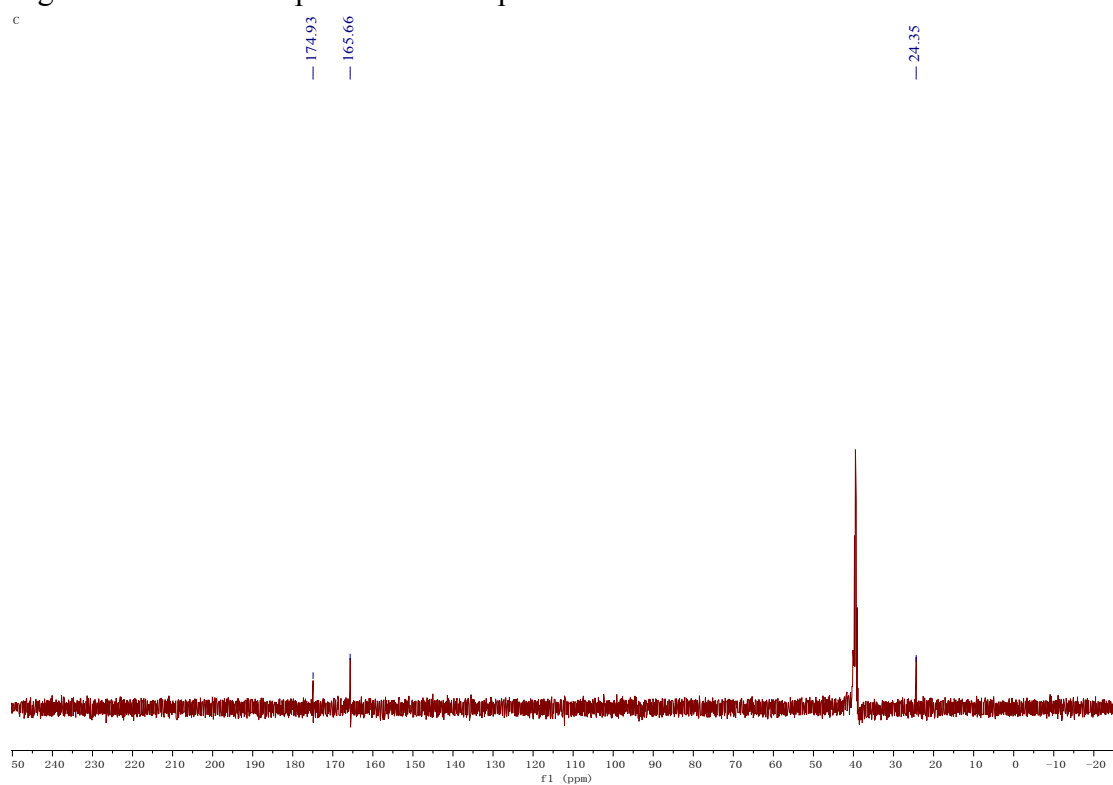

Figure S12 <sup>13</sup>C NMR spectrum of compound **5**.

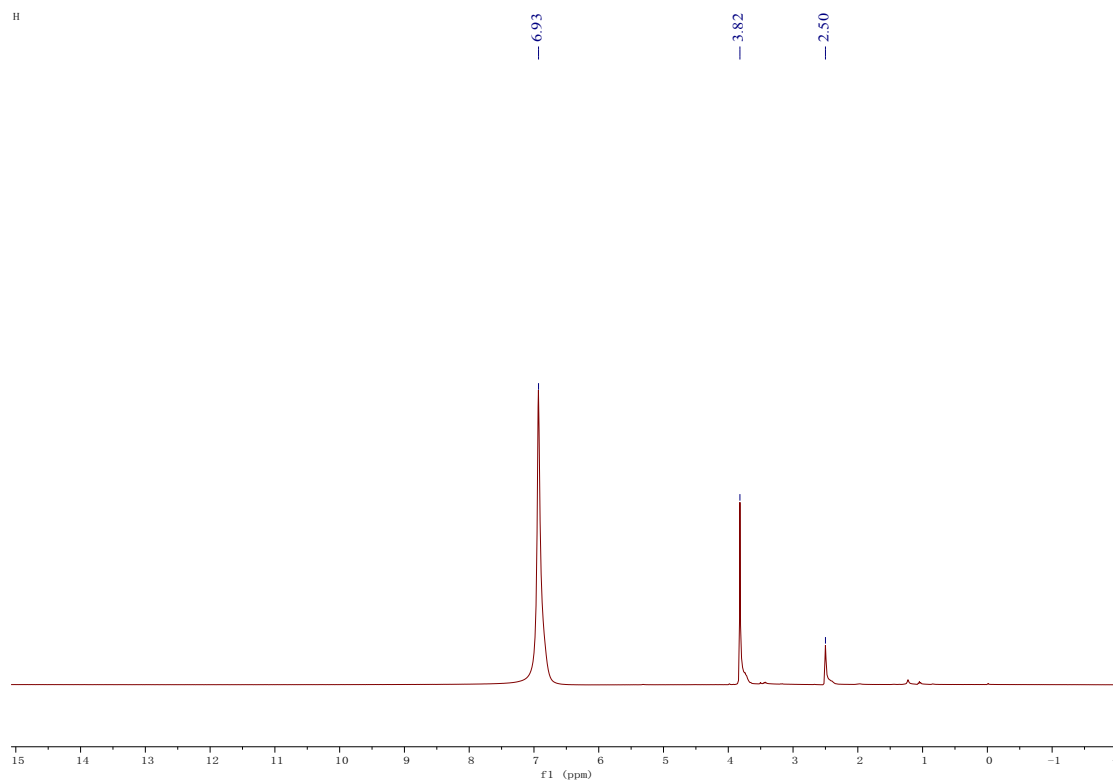

Figure S13  $^1\text{H}$  NMR spectrum of compound **6**.

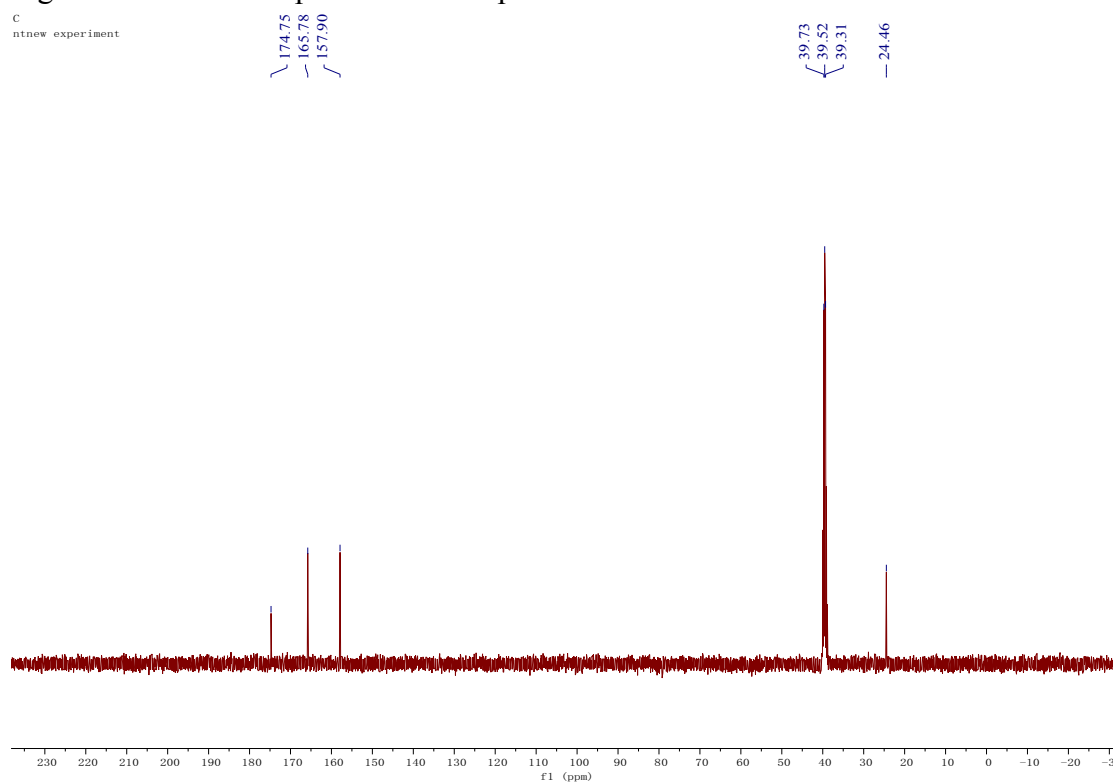

Figure S14  $^{13}\text{C}$  NMR spectrum of compound **6**.

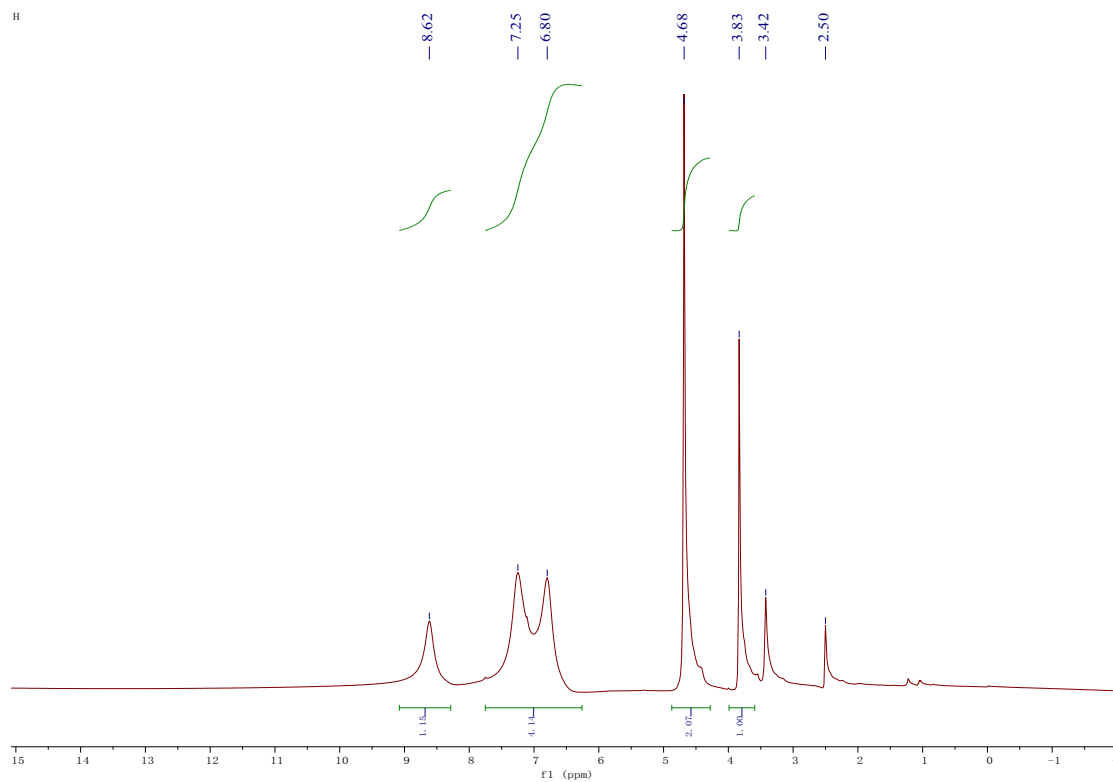

Figure S15  $^1\text{H}$  NMR spectrum of compound 7.

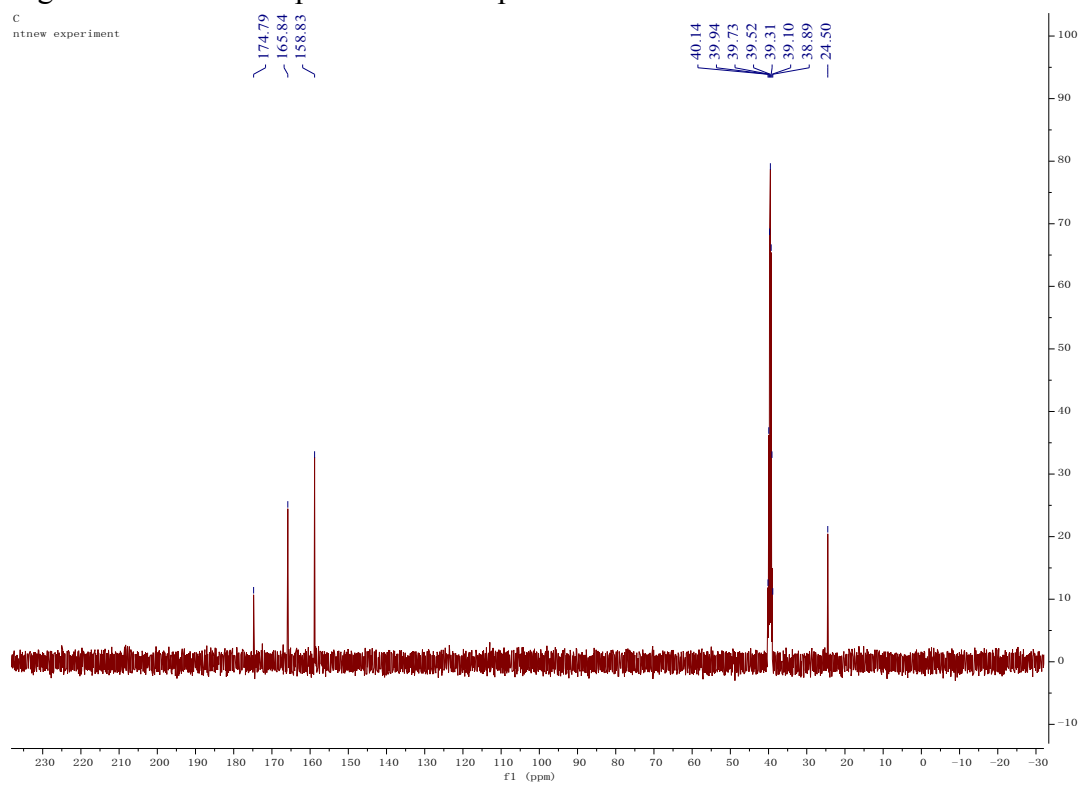

Figure S16  $^{13}\text{C}$  NMR spectrum of compound 7.



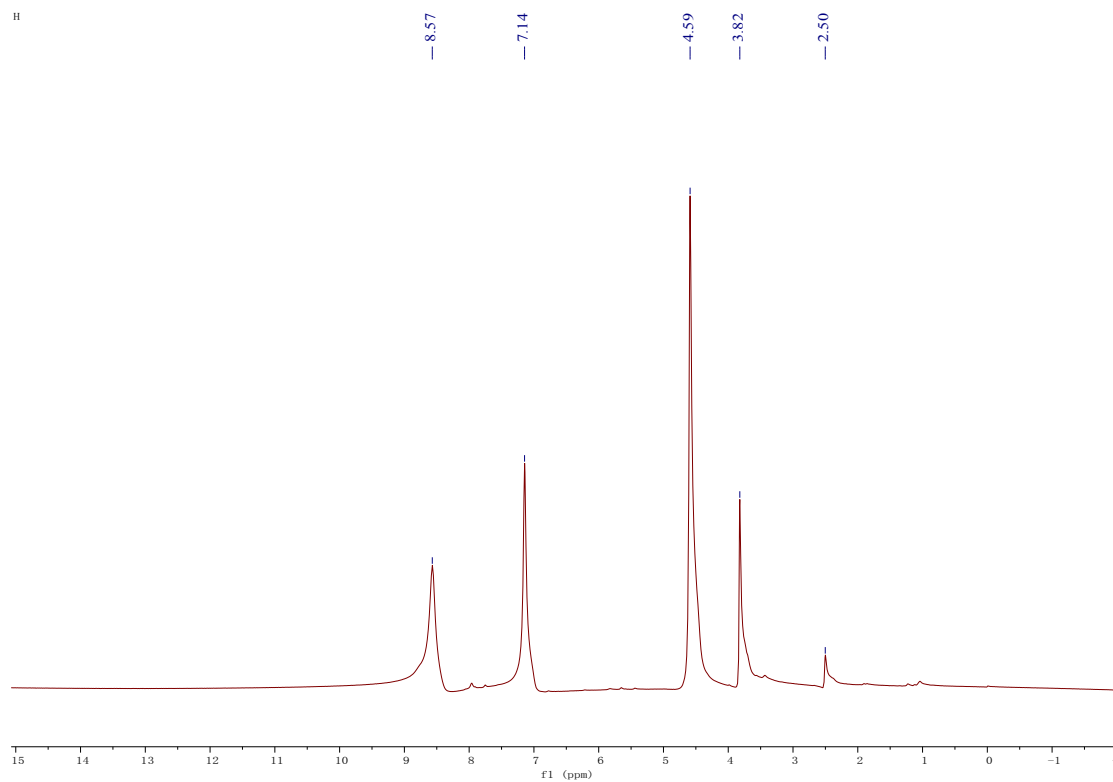

Figure S17  $^1\text{H}$  NMR spectrum of compound **8**.

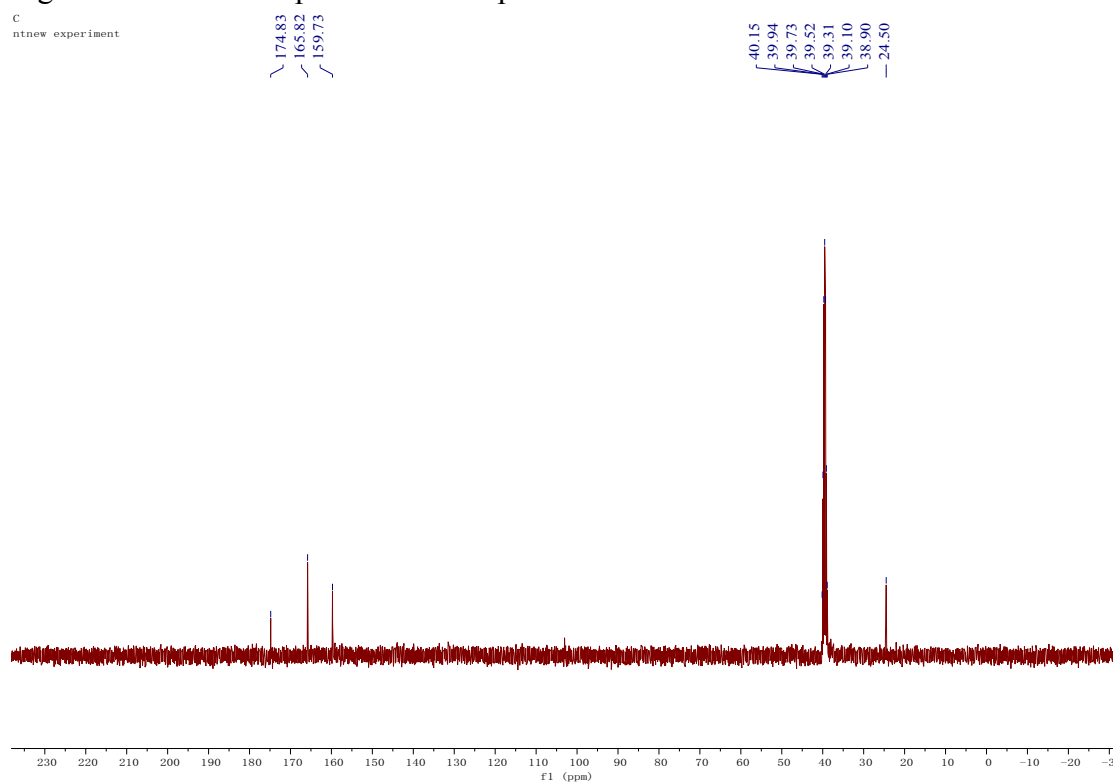

Figure S18  $^{13}\text{C}$  NMR spectrum of compound **8**.

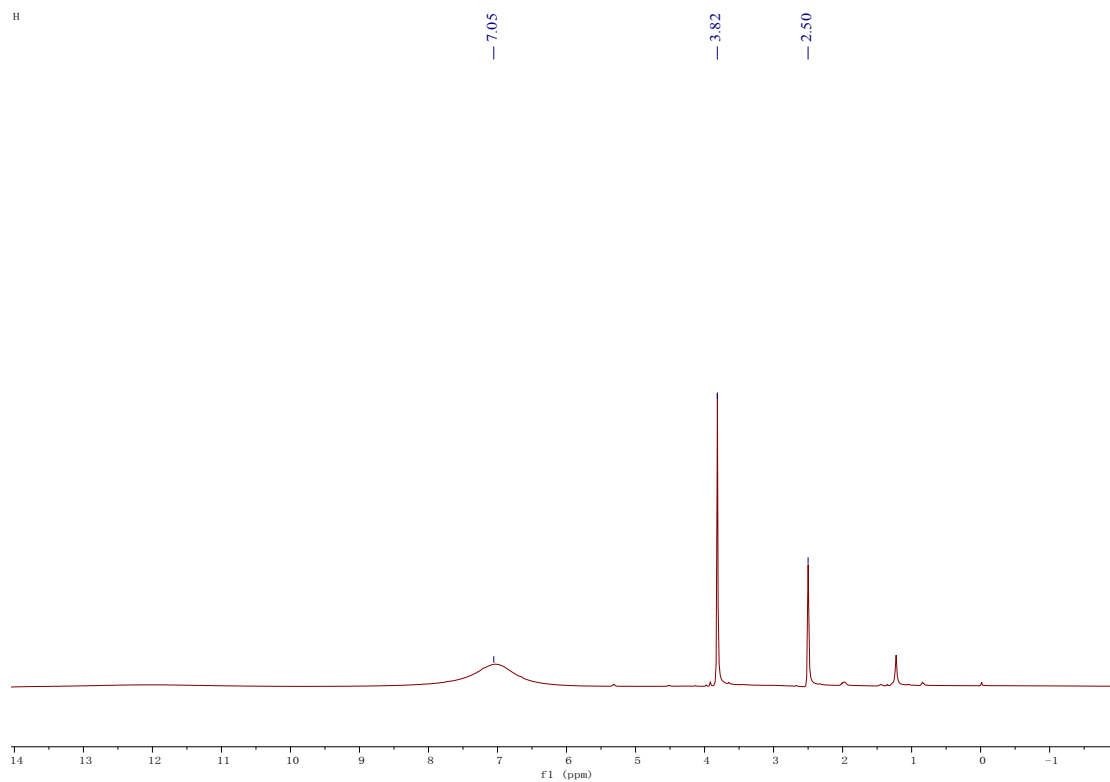

Figure S19  $^1\text{H}$  NMR spectrum of compound **9**.

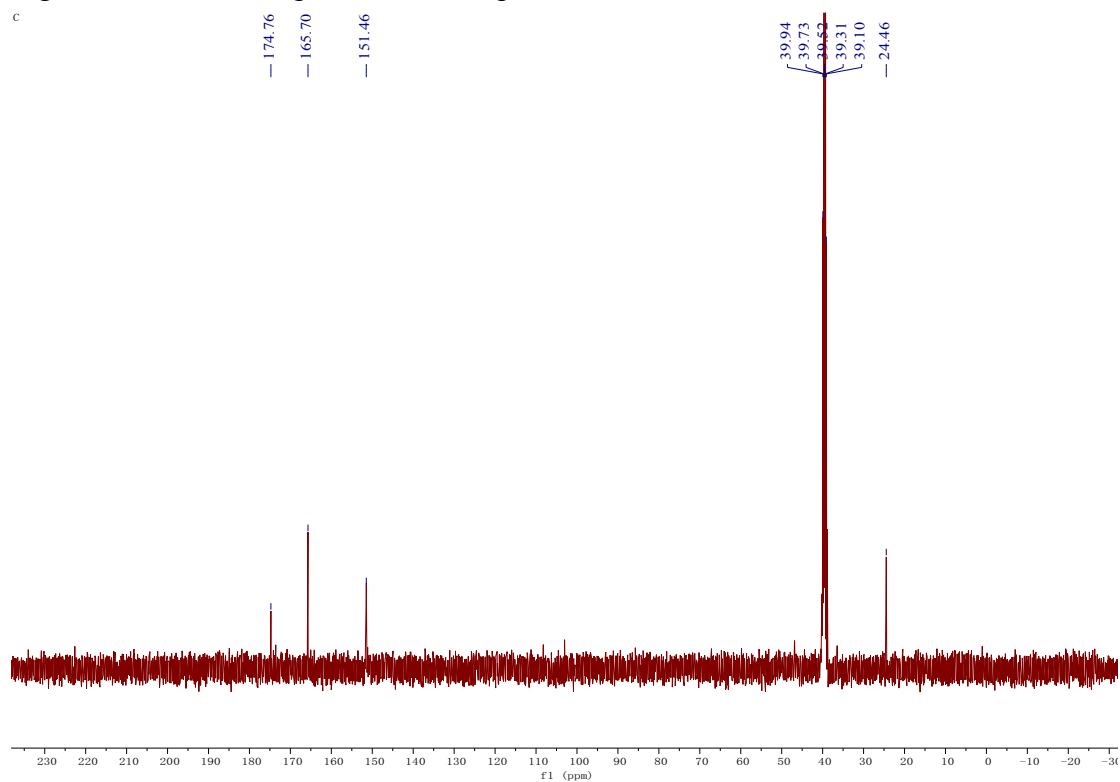

Figure S20  $^{13}\text{C}$  NMR spectrum of compound **9**.

## 2. DSC data

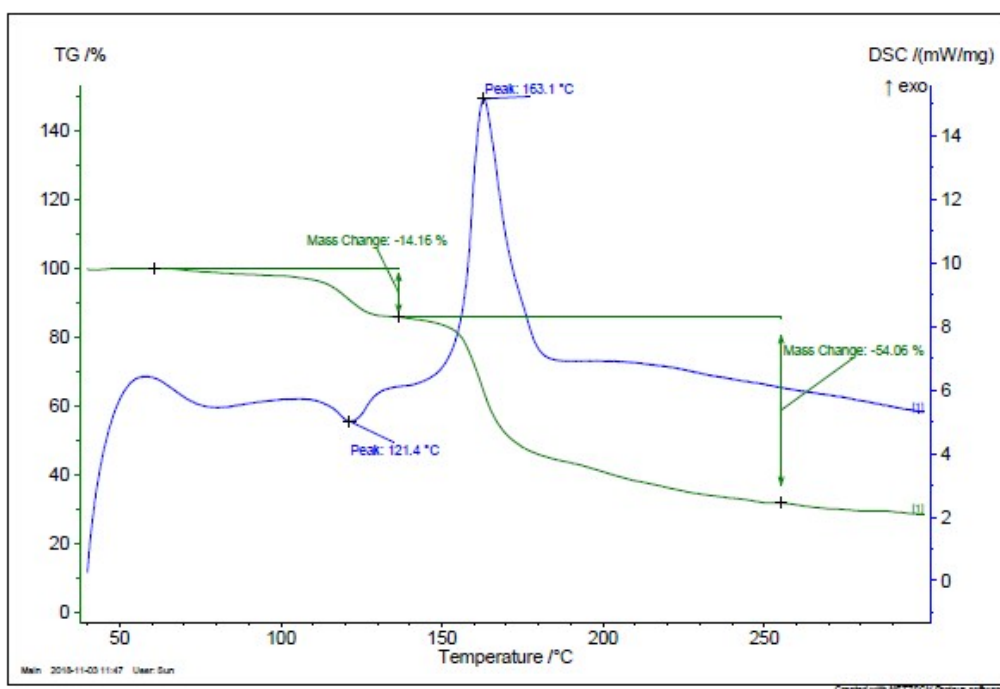

Figure S21 DSC curve of compound 3 with a heating rate of 5 K min<sup>-1</sup>.

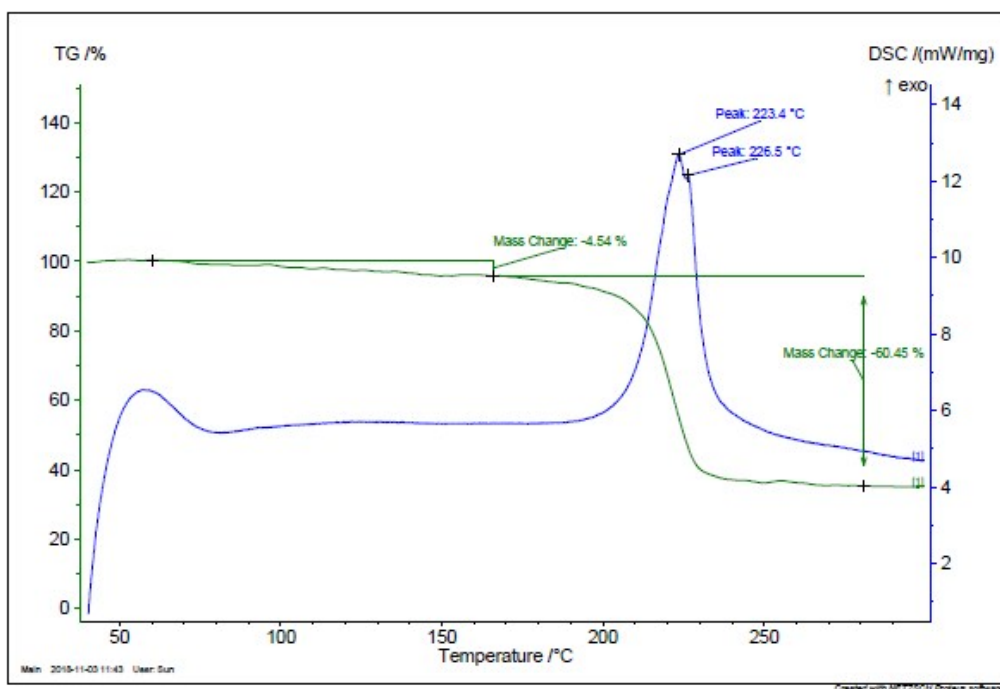

Figure S22 DSC curve of compound 4 with a heating rate of 5 K min<sup>-1</sup>.

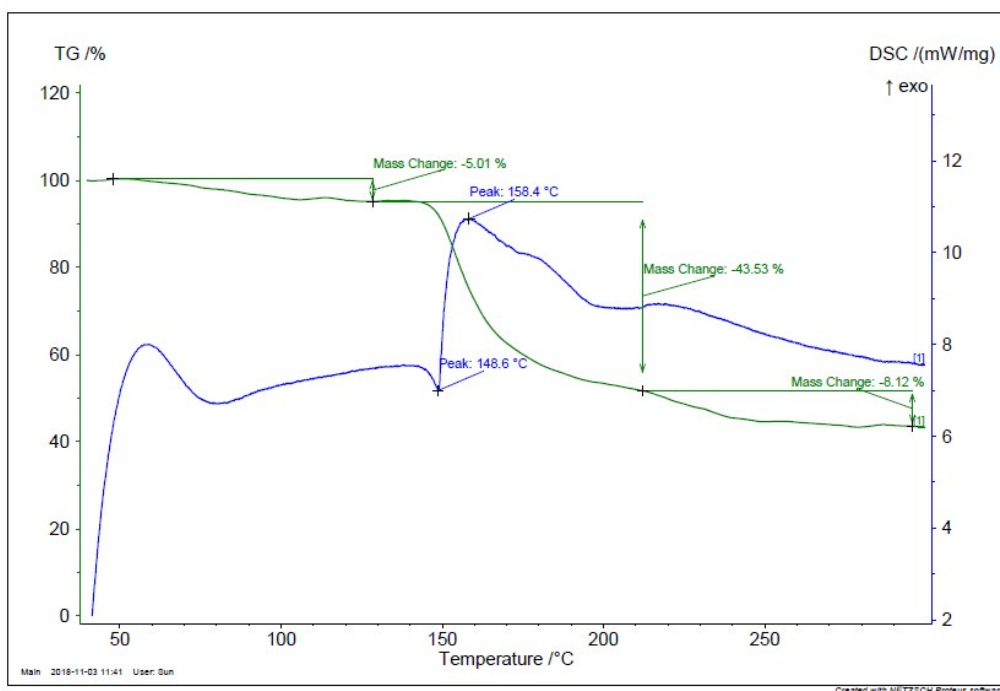

Figure S23 DSC curve of compound 5 with a heating rate of 5 K min<sup>-1</sup>.

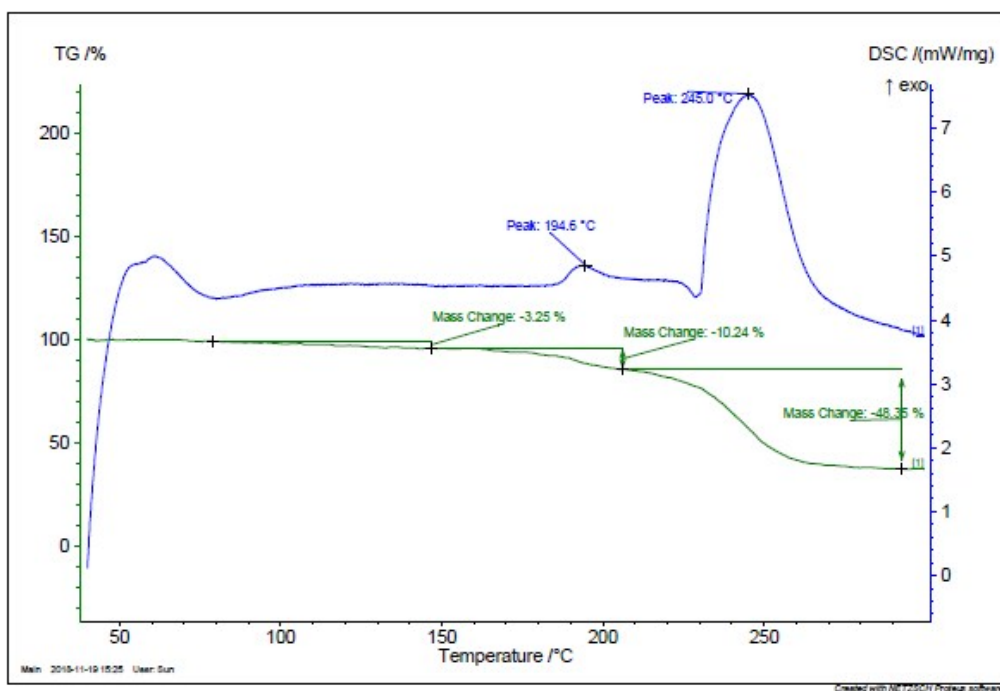

Figure S24 DSC curve of compound 6 with a heating rate of 5 K min<sup>-1</sup>.

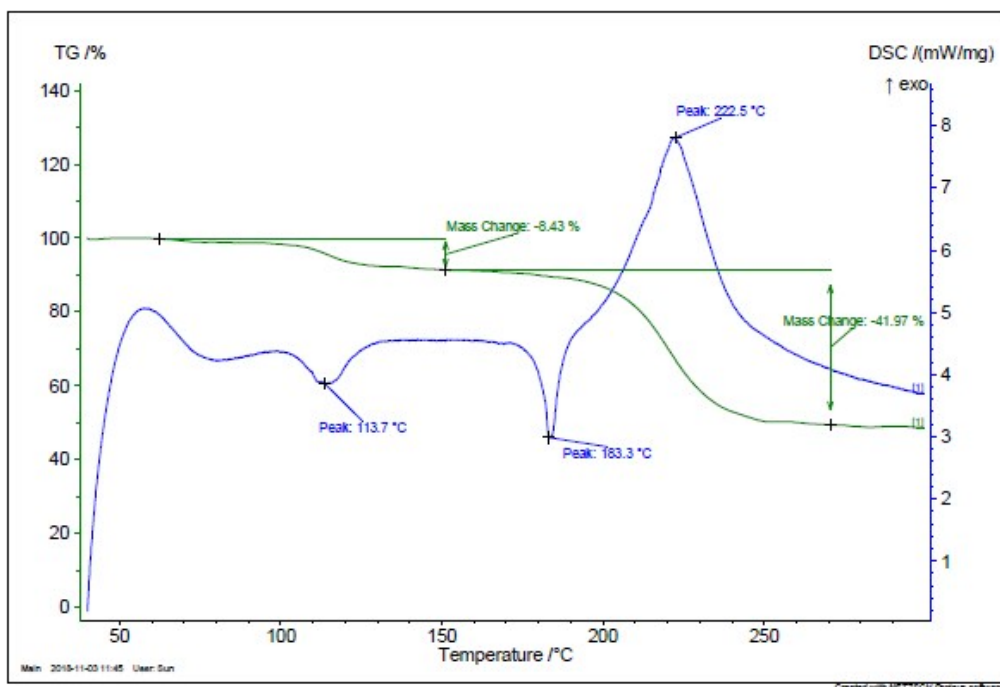

Figure S25 DSC curve of compound 7 with a heating rate of 5 K min<sup>-1</sup>.

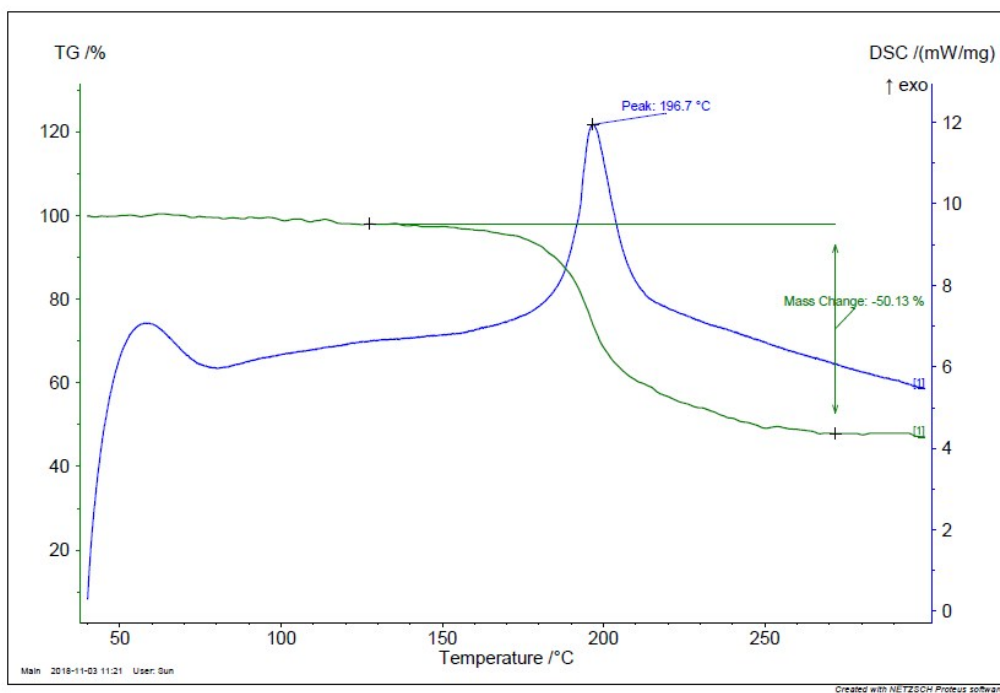

Figure S26 DSC curve of compound 8 with a heating rate of 5 K min<sup>-1</sup>.

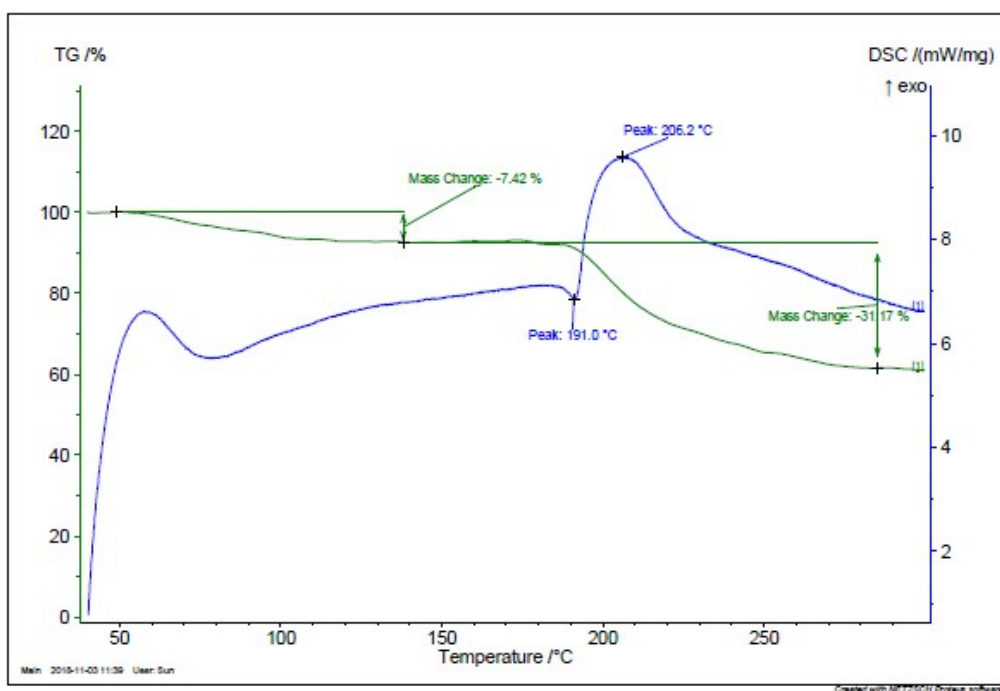

Figure S27 DSC curve of compound **9** with a heating rate of 5 K min<sup>-1</sup>.

### 3. Crystallographic data for compound **4**

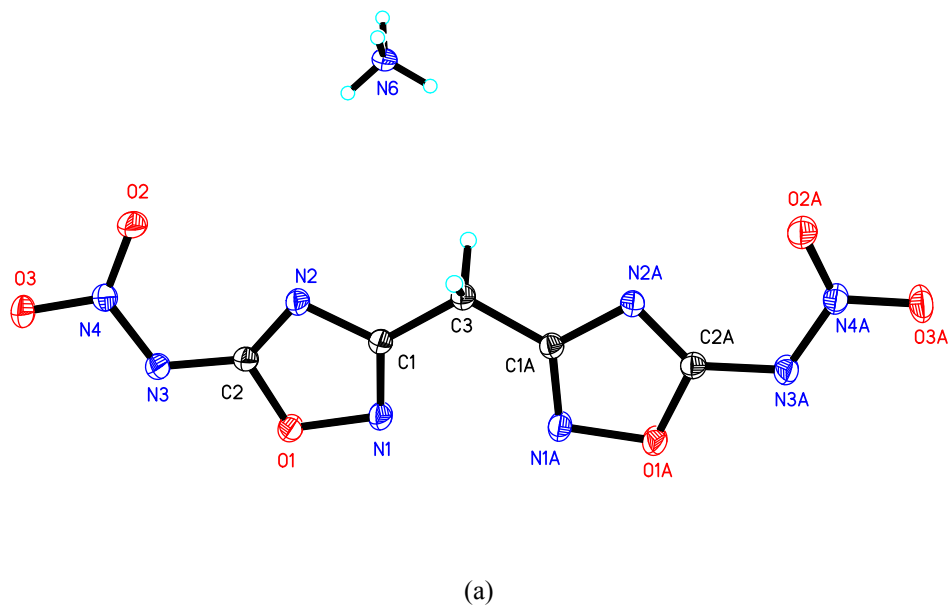

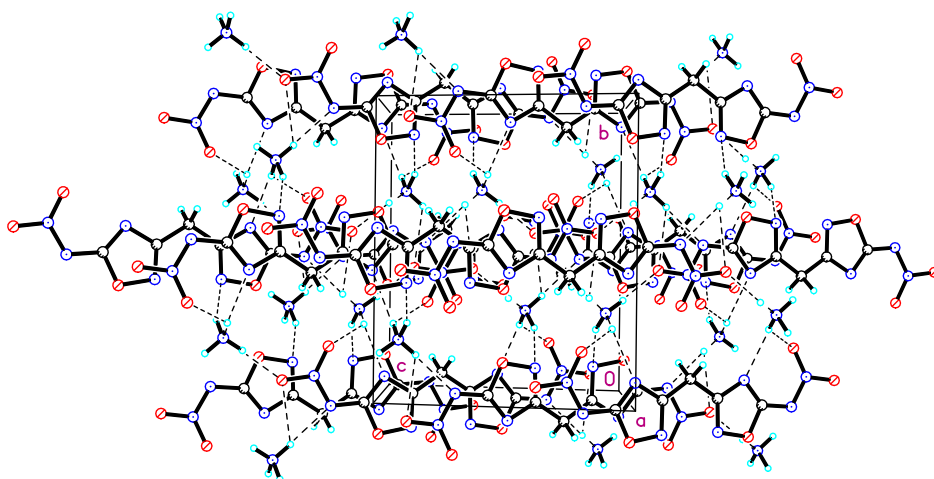

(b)

Figure S28: (a) Displacement ellipsoid plot (30%) of salt **4**. (b) Ball-and-stick packing diagram of salt **4** viewed down the a-axis. The dashed lines indicate hydrogen bonding.

Table S1. Crystal data and structure refinement for compound **4**.

|                                 |                                                               |                  |
|---------------------------------|---------------------------------------------------------------|------------------|
| Identification code             | mo_d8v18858_0m                                                |                  |
| Empirical formula               | C <sub>5</sub> H <sub>10</sub> N <sub>10</sub> O <sub>6</sub> |                  |
| Formula weight                  | 306.23                                                        |                  |
| Temperature                     | 296(2) K                                                      |                  |
| Wavelength                      | 0.71073 Å                                                     |                  |
| Crystal system                  | Monoclinic                                                    |                  |
| Space group                     | C 2/c                                                         |                  |
| Unit cell dimensions            | a = 11.0337(7) Å                                              | α = 90°.         |
|                                 | b = 11.2495(6) Å                                              | β = 105.107(2)°. |
|                                 | c = 9.7684(6) Å                                               | γ = 90°.         |
| Volume                          | 1170.59(12) Å <sup>3</sup>                                    |                  |
| Z                               | 4                                                             |                  |
| Density (calculated)            | 1.738 Mg/m <sup>3</sup>                                       |                  |
| Absorption coefficient          | 0.155 mm <sup>-1</sup>                                        |                  |
| F(000)                          | 632                                                           |                  |
| Crystal size                    | 0.180 x 0.150 x 0.120 mm <sup>3</sup>                         |                  |
| Theta range for data collection | 2.633 to 25.980°.                                             |                  |
| Index ranges                    | -13 ≤ h ≤ 13, -13 ≤ k ≤ 13, -12 ≤ l ≤ 12                      |                  |
| Reflections collected           | 10651                                                         |                  |

|                                   |                                             |
|-----------------------------------|---------------------------------------------|
| Independent reflections           | 1134 [R(int) = 0.0318]                      |
| Completeness to theta = 25.242°   | 98.5 %                                      |
| Absorption correction             | Semi-empirical from equivalents             |
| Max. and min. transmission        | 0.7456 and 0.6680                           |
| Refinement method                 | Full-matrix least-squares on F <sup>2</sup> |
| Data / restraints / parameters    | 1134 / 0 / 117                              |
| Goodness-of-fit on F <sup>2</sup> | 1.082                                       |
| Final R indices [I>2sigma(I)]     | R1 = 0.0295, wR2 = 0.0778                   |
| R indices (all data)              | R1 = 0.0317, wR2 = 0.0796                   |
| Extinction coefficient            | 0.027(7)                                    |
| Largest diff. peak and hole       | 0.237 and -0.177 e.Å <sup>-3</sup>          |

Table S2. Atomic coordinates ( $\times 10^4$ ) and equivalent isotropic displacement parameters ( $\text{\AA}^2 \times 10^3$ ) for compound **4**. U(eq) is defined as one third of the trace of the orthogonalized  $U^{ij}$  tensor.

|      | x       | y       | z       | U(eq) |
|------|---------|---------|---------|-------|
| N(1) | 991(1)  | 6057(1) | 3699(1) | 35(1) |
| N(2) | 1626(1) | 4311(1) | 4786(1) | 28(1) |
| N(3) | 3066(1) | 5265(1) | 6860(1) | 32(1) |
| N(4) | 3518(1) | 4245(1) | 7505(1) | 30(1) |
| N(6) | 5842(1) | 2947(1) | 910(1)  | 36(1) |
| O(1) | 1909(1) | 6257(1) | 5001(1) | 37(1) |
| O(2) | 3303(1) | 3255(1) | 6955(1) | 40(1) |
| O(3) | 4204(1) | 4381(1) | 8730(1) | 43(1) |
| C(1) | 875(1)  | 4906(1) | 3658(1) | 25(1) |
| C(2) | 2232(1) | 5177(1) | 5574(1) | 26(1) |
| C(3) | 0       | 4224(2) | 2500    | 29(1) |

Table S3. Bond lengths [ $\text{\AA}$ ] and angles [ $^\circ$ ] for compound **4**.

|           |            |
|-----------|------------|
| N(1)-C(1) | 1.3000(15) |
| N(1)-O(1) | 1.4223(13) |
| N(2)-C(2) | 1.3122(15) |
| N(2)-C(1) | 1.3690(15) |
| N(3)-N(4) | 1.3407(14) |



|                  |            |
|------------------|------------|
| N(3)-C(2)        | 1.3537(15) |
| N(4)-O(2)        | 1.2323(13) |
| N(4)-O(3)        | 1.2471(14) |
| N(6)-H(6A)       | 0.92(2)    |
| N(6)-H(6B)       | 0.88(2)    |
| N(6)-H(6C)       | 0.99(2)    |
| N(6)-H(6D)       | 0.84(3)    |
| O(1)-C(2)        | 1.3455(14) |
| C(1)-C(3)        | 1.4936(14) |
| C(3)-C(1)#1      | 1.4936(14) |
| C(3)-H(3)        | 0.968(15)  |
|                  |            |
| C(1)-N(1)-O(1)   | 103.09(9)  |
| C(2)-N(2)-C(1)   | 102.57(9)  |
| N(4)-N(3)-C(2)   | 116.97(10) |
| O(2)-N(4)-O(3)   | 121.94(10) |
| O(2)-N(4)-N(3)   | 124.22(10) |
| O(3)-N(4)-N(3)   | 113.83(10) |
| H(6A)-N(6)-H(6B) | 107.7(19)  |
| H(6A)-N(6)-H(6C) | 106.1(16)  |
| H(6B)-N(6)-H(6C) | 109.9(16)  |
| H(6A)-N(6)-H(6D) | 119(2)     |
| H(6B)-N(6)-H(6D) | 117(2)     |
| H(6C)-N(6)-H(6D) | 96(2)      |
| C(2)-O(1)-N(1)   | 106.20(9)  |
| N(1)-C(1)-N(2)   | 115.35(10) |
| N(1)-C(1)-C(3)   | 125.03(11) |
| N(2)-C(1)-C(3)   | 119.62(10) |
| N(2)-C(2)-O(1)   | 112.77(10) |
| N(2)-C(2)-N(3)   | 135.87(11) |
| O(1)-C(2)-N(3)   | 111.27(10) |
| C(1)-C(3)-C(1)#1 | 118.15(14) |
| C(1)-C(3)-H(3)   | 106.7(9)   |
| C(1)#1-C(3)-H(3) | 108.2(9)   |

---

Symmetry transformations used to generate equivalent atoms:

#1 -x,y,-z+1/2

Table S4. Anisotropic displacement parameters ( $\text{\AA}^2 \times 10^3$ ) for compound **4**. The anisotropic displacement factor exponent takes the form:  $-2\pi^2[h^2 a^{*2}U^{11} + \dots + 2 h k a^* b^* U^{12}]$

|      | U <sup>11</sup> | U <sup>22</sup> | U <sup>33</sup> | U <sup>23</sup> | U <sup>13</sup> | U <sup>12</sup> |
|------|-----------------|-----------------|-----------------|-----------------|-----------------|-----------------|
| N(1) | 37(1)           | 26(1)           | 31(1)           | -2(1)           | -8(1)           | 0(1)            |
| N(2) | 31(1)           | 23(1)           | 25(1)           | 0(1)            | -1(1)           | -1(1)           |
| N(3) | 36(1)           | 25(1)           | 29(1)           | -3(1)           | -3(1)           | 2(1)            |
| N(4) | 28(1)           | 30(1)           | 28(1)           | -3(1)           | 0(1)            | 2(1)            |
| N(6) | 41(1)           | 25(1)           | 37(1)           | -2(1)           | 3(1)            | 0(1)            |
| O(1) | 43(1)           | 22(1)           | 35(1)           | -2(1)           | -10(1)          | 0(1)            |
| O(2) | 45(1)           | 26(1)           | 42(1)           | -4(1)           | -5(1)           | 4(1)            |
| O(3) | 47(1)           | 42(1)           | 29(1)           | -2(1)           | -10(1)          | 6(1)            |
| C(1) | 25(1)           | 23(1)           | 24(1)           | 0(1)            | 3(1)            | 1(1)            |
| C(2) | 27(1)           | 23(1)           | 27(1)           | -2(1)           | 4(1)            | 1(1)            |
| C(3) | 32(1)           | 23(1)           | 27(1)           | 0               | -2(1)           | 0               |

Table S5. Hydrogen coordinates ( $\times 10^4$ ) and isotropic displacement parameters ( $\text{\AA}^2 \times 10^3$ ) for compound **4**.

|       | x        | y        | z        | U(eq) |
|-------|----------|----------|----------|-------|
| H(3)  | 516(15)  | 3721(14) | 2077(16) | 41(4) |
| H(6A) | 5300(20) | 3369(19) | 210(20)  | 75(6) |
| H(6B) | 6203(19) | 3450(20) | 1590(20) | 70(6) |
| H(6C) | 5324(19) | 2380(20) | 1270(20) | 74(6) |
| H(6D) | 6310(20) | 2440(20) | 680(20)  | 91(8) |

Table S6. Torsion angles [°] for compound 4.

---

|                       |             |
|-----------------------|-------------|
| C(2)-N(3)-N(4)-O(2)   | 6.27(18)    |
| C(2)-N(3)-N(4)-O(3)   | -174.72(11) |
| C(1)-N(1)-O(1)-C(2)   | 0.33(13)    |
| O(1)-N(1)-C(1)-N(2)   | -0.63(14)   |
| O(1)-N(1)-C(1)-C(3)   | 179.09(9)   |
| C(2)-N(2)-C(1)-N(1)   | 0.66(14)    |
| C(2)-N(2)-C(1)-C(3)   | -179.07(9)  |
| C(1)-N(2)-C(2)-O(1)   | -0.40(13)   |
| C(1)-N(2)-C(2)-N(3)   | 175.83(14)  |
| N(1)-O(1)-C(2)-N(2)   | 0.06(14)    |
| N(1)-O(1)-C(2)-N(3)   | -177.12(9)  |
| N(4)-N(3)-C(2)-N(2)   | 7.5(2)      |
| N(4)-N(3)-C(2)-O(1)   | -176.21(10) |
| N(1)-C(1)-C(3)-C(1)#1 | -4.30(9)    |
| N(2)-C(1)-C(3)-C(1)#1 | 175.41(11)  |

---

Symmetry transformations used to generate equivalent atoms:

#1 -x,y,-z+1/2

## 4 Ab Initio computational data

Table S7. Ab Initio computational data

| Species                                                                           | $E_0$<br>(Hartree) | $H_{\text{corr}}$<br>(Hartree) | ZPE<br>(Hartree) | HOF<br>(kJ/mol)       |
|-----------------------------------------------------------------------------------|--------------------|--------------------------------|------------------|-----------------------|
| 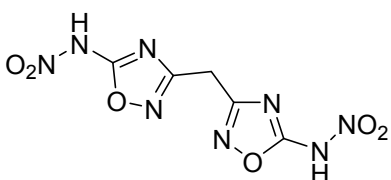 | -1079.9555336      | 0.156665                       | 0.139739         | 115.9468485           |
|  | -1078.8589014      | 0.129729                       | 0.113645         | 18.44134449           |
| CH <sub>4</sub>                                                                   | -40.3984857        | 0.048605                       | 0.044793         | -74.6 <sup>[1]</sup>  |
| NH <sub>3</sub>                                                                   | -56.4341763        | 0.038190                       | 0.034372         | -45.9 <sup>[2]</sup>  |
|  | -261.5728129       | 0.050912                       | 0.046541         | 75 <sup>[2]</sup>     |
| NH <sub>2</sub> NO <sub>2</sub>                                                   | -260.5478787       | 0.042613                       | 0.039257         | -6.1 <sup>[3]</sup>   |
| ·NHNO <sub>2</sub>                                                                | -260.0119632       | 0.030444                       | 0.026168         | -84.0 <sup>[4]</sup>  |
| CH <sub>3</sub> CH <sub>3</sub>                                                   | -79.6068548        | 0.079039                       | 0.074609         | -84.68 <sup>[5]</sup> |
| CH <sub>3</sub> NH <sub>2</sub>                                                   | -95.6318759        | 0.068401                       | 0.064032         | -23.0 <sup>[2]</sup>  |

<sup>a</sup> Total energy ( $E_0$ ) calculated by B3LYP/6-31+G\*\*/MP2/6-311++G\*\* method (Hartree/Particle);

<sup>b</sup> Values of thermal correction ( $HT$ ) (Hartree/Particle); <sup>c</sup> Zero-point correction (ZPE) (Hartree/Particle); <sup>d</sup> Heat of formation (HOF) (kJ/mol).

## 5 Detonation performances calculation

Detonation pressure ( $P$ ) and detonation velocity ( $D$ ) were calculation according to the Kamlet-Jacobs equations<sup>[6]</sup>.

$$D = 1.01(N\bar{M}^{1/2}Q^{1/2})^{1/2}(1 + 1.30\rho) \quad (4)$$

$$P = 1.558\rho^2\bar{M}^{1/2}Q^{1/2} \quad (5)$$

where each term in eqs 4 and 5 is defined as follows:  $D$ , the detonation velocity (km s<sup>-1</sup>);  $P$ , the detonation pressure (GPa);  $N$ , the moles of detonation gases per gram explosive;  $\bar{M}$ , the average molecular weight of these gases (g mol<sup>-1</sup>);  $Q$ , the heat of detonation (J g<sup>-1</sup>); and  $\rho$ , the loaded density of explosives (g cm<sup>-3</sup>). The measured density was used for the calculation here.

- 
- [1]Y. Huang, H. Gao, B. Twamley, J.M. Shreeve. *Eur. J. Inorg. Chem.* **2008**, 2560-2568.
- [2]W. H, C. He, J. Zhang, J. M. Shreeve. *Angew. Chem. Int. Ed.* **2015**, *54*, 9367-9371.
- [3]K. Wang, D. A. Parrish, J. M. Shreeve. *Chem. Eur. J.* **2011**, *17*, 14485-14492.
- [4]Y. Tang, J. Zhang, L. A. Mitchell, et al. *J. Am. Chem. Soc.* **2015**, *137*, 15984-15987
- [5]C. Ye, H. Gao, B. Twamley and J. M. Shreeve. *New. J. Chem.* **2008**, *32*, 317-322.
- [6](a) M. J. Kamlet, S. J. Jacobs. *J. Chem. Phys.* **1968**, *48*, 23-35; (b) M. J. Kamlet, J. E. Ablard. *J. Chem. Phys.* **1968**, *48*, 36-42; (c) M. J. Kamlet, C. Dicknison. *J. Chem. Phys.* **1968**, *48*, 43-49. (d) H. Gao, C. Ye, C. Piekarski, J. M. Shreeve. *J. Phys. Chem. C.* **2007**, *111*, 10718-10731.
